# Supplementary material
Source: PubMed Central journal article supplement (PMC6293277)
Supplement: EMBJ-37-e99649-s001.pdf [file EMBJ-37-e99649-s001.pdf]

## Expanded View Figures

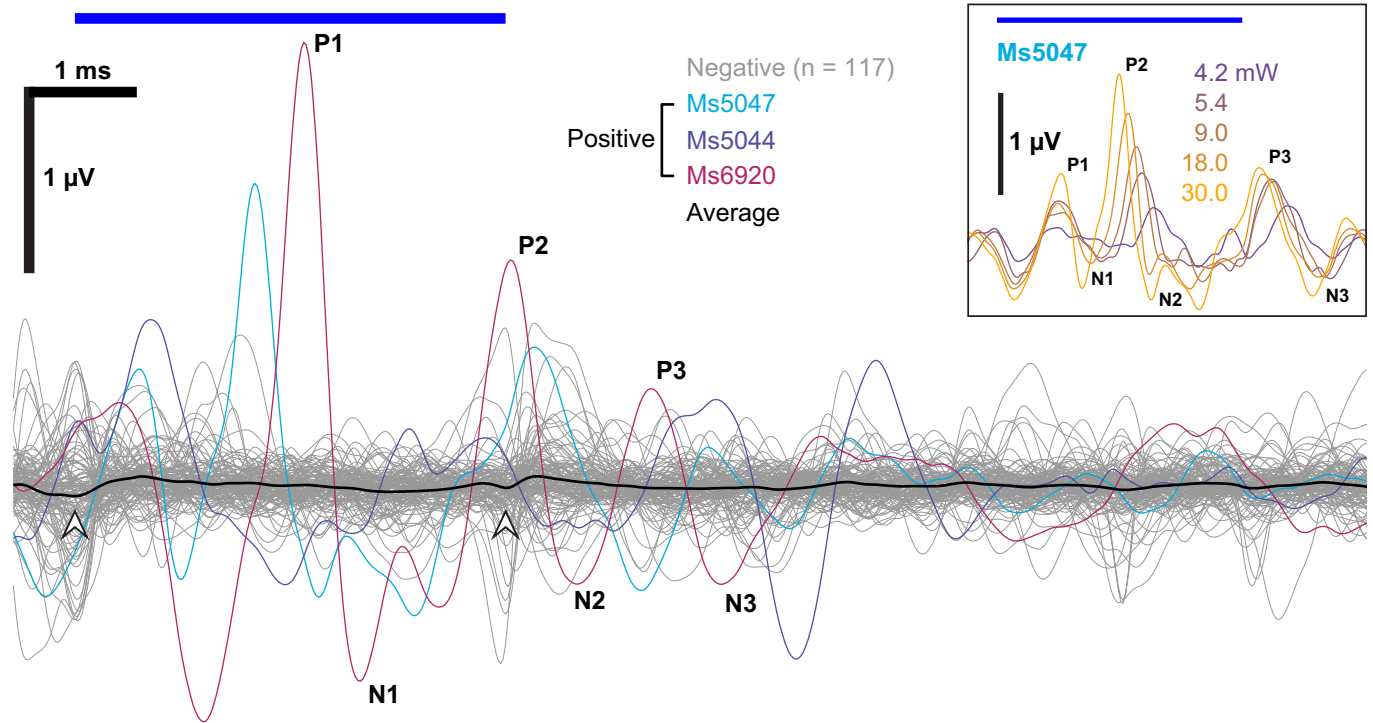

**Figure EV1. Demonstrating functional expression of Chronos in SGNs following transuterine AAV2/6 injection reported by recordings of oABRs.**

In 3 out of dozens of animals, we could record oABRs using fiber-coupled laser stimulation 4–12 weeks after embryonic transuterine injection of AAV2/6 carrying Chronos using 4 ms pulse train at 10 Hz with 30 mW radiant flux. Responses were verified as oABRs by the increasing amplitude with stronger light pulses (inset: shows oABRs of an exemplary oABR-positive mouse for varying radiant flux, colors code the radiant flux in mW). A small onset and offset artifact (arrowheads) is visible for the average (black) of the negative animals (gray) which we occasionally observed in the early phase of the project.

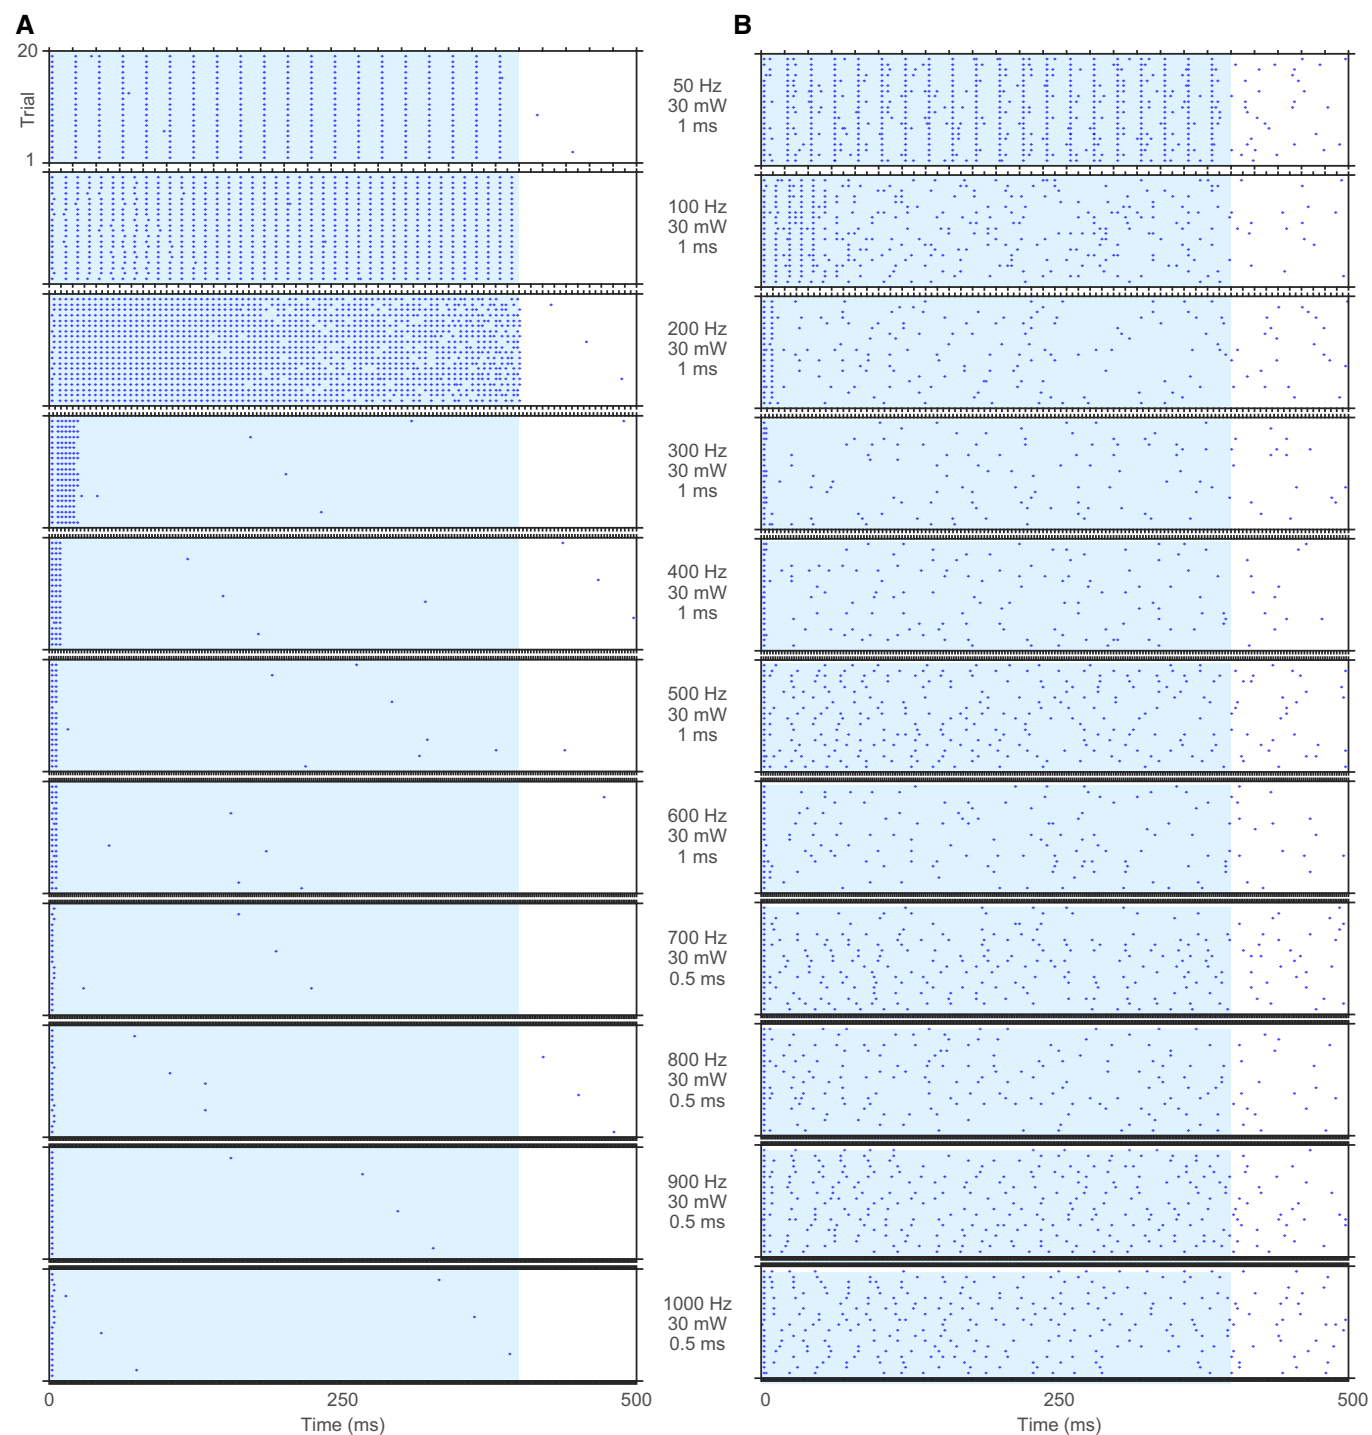

**Figure EV2. Activity of two exemplary putative SGNs upon light stimulation at increasing repetition rates.**

A Raster plot showing spike timing (blue symbols) of a rapidly adapting putative SGN in response to 400-ms pulse trains at stimulation rates 50–1,000 Hz (30 mW, 1 ms for 50–600 Hz; 30 mW, 0.5 ms for 700–1,000 Hz).

B Raster plot showing activity of a slowly adapting putative SGN in response to the stimulation paradigm described in (A).
